# Supplementary material
Source: PubMed Central journal article supplement (PMC8843802)
Supplement: NIHMS1653003-supplement-1.pdf [file NIHMS1653003-supplement-1.pdf]

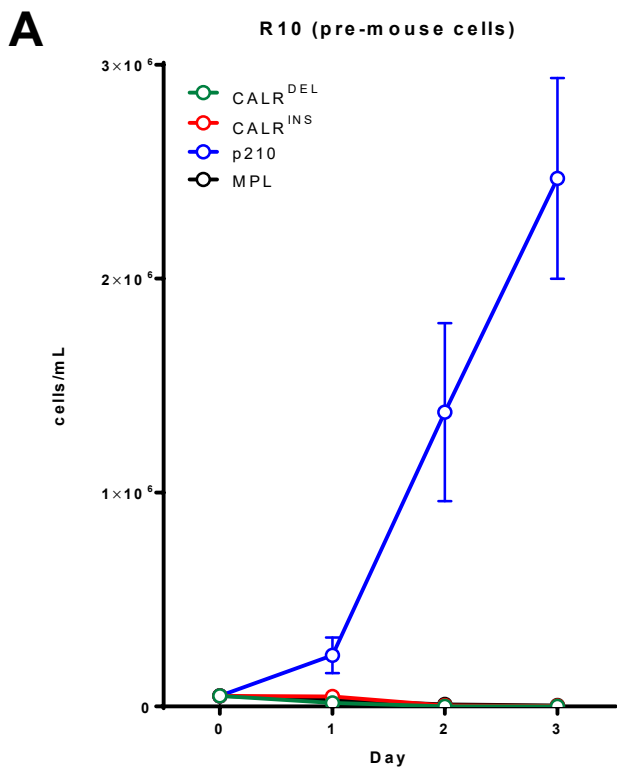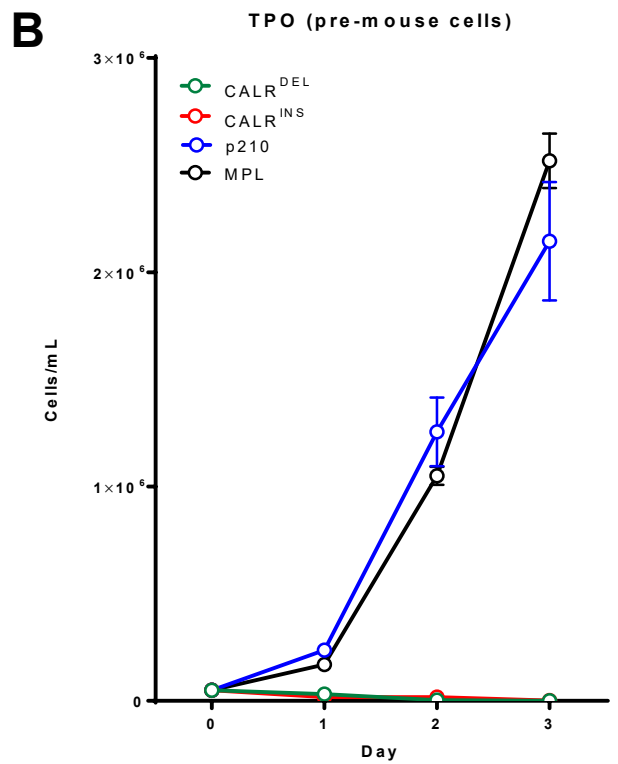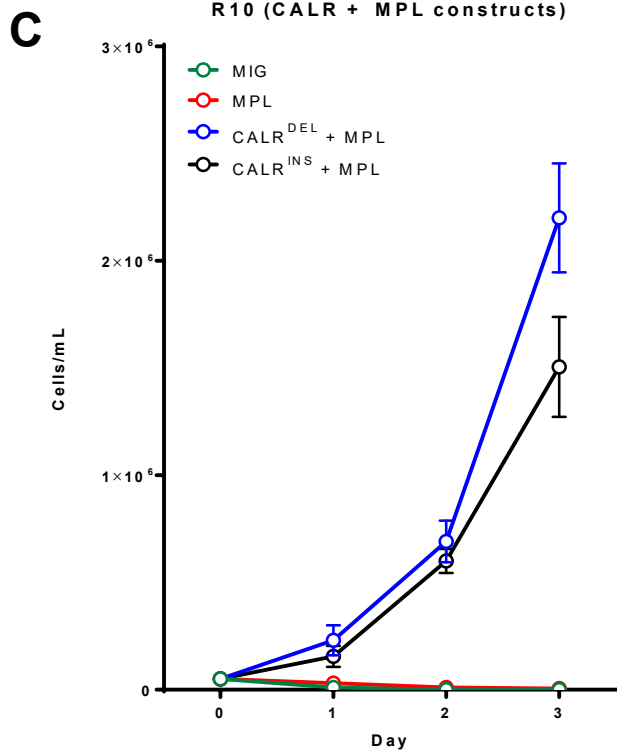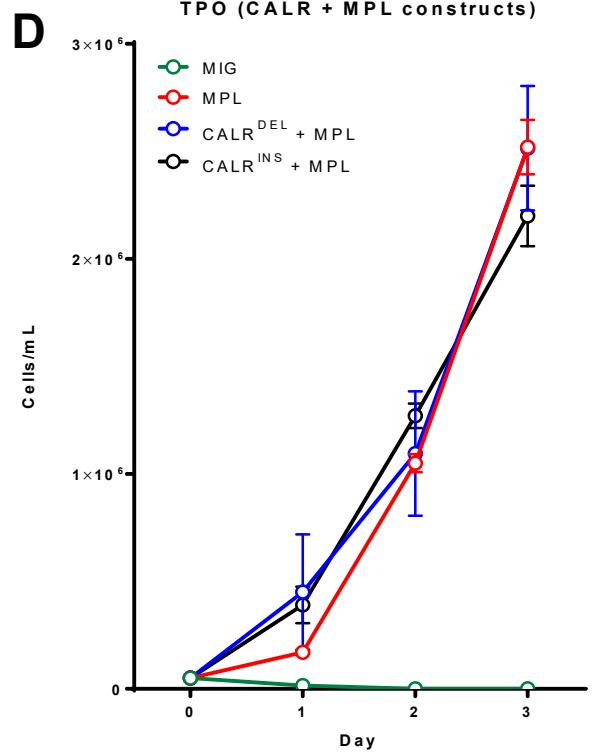

**Supplemental Figure 1. CALR mutant Ba/F3 cells are not cytokine independent without MPL.** Ba/F3 cells were created expressing empty vector, CALR<sup>DEL</sup>, or CALR<sup>INS</sup>, CALR<sup>DEL</sup> + MPL, CALR<sup>INS</sup> + MPL, or p210. 5 x 10<sup>4</sup> cells were placed in either RPMI + 10% FBS (R10) media without cytokines (A and C) or R10 + 10ng/mL TPO (B and D) and cells were counted daily.

| Mouse # | Type of cells injected | Days post-transplant sacrificed or found dead | %GFP in peripheral blood | %GFP in bone marrow | %GFP in spleen |
|---------|------------------------|-----------------------------------------------|--------------------------|---------------------|----------------|
| 389     | CALR <sup>DEL</sup>    | 51                                            | 50.7                     | ND                  | ND             |
| 502     | CALR <sup>DEL</sup>    | 42                                            | 42.2                     | 33.3                | 28.7           |
| 521     | CALR <sup>INS</sup>    | 55                                            | 15.5                     | 19.6                | 17.1           |
| 774     | CALR <sup>INS</sup>    | 81                                            | 63.2                     | 33.0                | 49.0           |

ND = Not Determined

**Supplemental Table 1.** Information on mice with expansion of CALR<sup>DEL</sup> or CALR<sup>INS</sup> Ba/F3 cells at sacrifice

|                                      | mIL-3 | mIFN- $\gamma$ | mGMCSF | mTPO  | mIL-11 | mSCR | mMCSF | mIL-7 | mEPO | no cytokines |
|--------------------------------------|-------|----------------|--------|-------|--------|------|-------|-------|------|--------------|
| Post-mouse CALR <sup>DEL</sup> (389) | Green | Red            | Red    | Green | Red    | Red  | Red   | Red   | Red  | Green        |
| Post-mouse CALR <sup>DEL</sup> (502) | Green | Red            | Red    | Green | Red    | Red  | Red   | Red   | Red  | Green        |
| Post-mouse CALR <sup>INS</sup> (774) | Green | Red            | Red    | Green | Red    | Red  | Red   | Red   | Red  | Red          |
| Post-mouse CALR <sup>INS</sup> (521) | Green | Red            | Red    | Green | Red    | Red  | Red   | Red   | Red  | Red          |

|           |
|-----------|
| GROWTH    |
| NO GROWTH |

**Supplemental Table 2.** Growth of post-mouse cell lines with specific cytokines
